# Supplementary material for: NKG2D Fine-Tunes the Local Inflammatory Response in Colorectal Cancer
Source: MDPI journal article supplement (doi:10.3390/cancers15061792), 2023-03-16
Supplement: s1 [file s1]

## Supplementary Materials

**Supplementary Table S1.** Antibodies used in this study.

| Antigen                          | Conjugate      | Clone    | Source       |
|----------------------------------|----------------|----------|--------------|
| B220                             | PE-Cy7         | RA3-6B2  | BioLegend    |
| CD11b                            | APC-eFluor780  | M1/70    | eBioscience  |
| CD11b                            | PE-CF594       | M1/70    | BD           |
| CD11b                            | PerCp-Cy5.5    | M1/70    | eBioscience  |
| CD19                             | APC-eFluor780  | 1D3      | eBioscience  |
| CD19                             | BV650          | 6D5      | BioLegend    |
| CD27                             | BV510          | LG.3A10  | BD           |
| CD27                             | PE/Dazzle594   | LG.3A10  | BioLegend    |
| CD3                              | BV650          | 17A2     | BioLegend    |
| CD3                              | V450           | 17A2     | BD           |
| CD3                              | PE-CF594       | 145-2C11 | BD           |
| CD3                              | BUV737         | 145-2C11 | BD           |
| CD4                              | APC-eFluor780  | GK1.5    | Invitrogen   |
| CD4                              | BV605          | GK1.5    | BioLegend    |
| CD4                              | APC-eFluor780  | RM4-5    | eBioscience  |
| CD4                              | BV711          | RM4-5    | BioLegend    |
| CD4                              | BUV495         | GK1.5    | BD           |
| CD44                             | PerCP-Cy5.5    | IM7      | BioLegend    |
| CD45                             | BV605          | 30-F11   | BioLegend    |
| CD45                             | AF700          | 30-F11   | BioLegend    |
| CD8 $\alpha$                     | BUV395         | 53-6.7   | BD           |
| CD8 $\alpha$                     | APC-eFluor780  | 53-6.7   | Invitrogen   |
| CD8 $\alpha$                     | PerCp-Cy5.5    | 53-6.7   | BioLegend    |
| CD8 $\alpha$                     | BV785          | 53-6.7   | BioLegend    |
| CD8 $\alpha$                     | BUV395         | 53-6.7   | BD           |
| EpCAM                            | APC-eFluor780  | G8.8     | eBioscience  |
| Fixable Aqua Dead Cell Stain Kit | N/A            | N/A      | ThermoFisher |
| Granzyme B                       | AlexaFluor-647 | GB11     | BioLegend    |
| IFN-g                            | PE-Cy7         | XMG1.2   | eBioscience  |

|                    |                  |              |             |
|--------------------|------------------|--------------|-------------|
| IFN- $\gamma$      | PE               | XMG1.2       | eBioscience |
| IL-17A             | FITC             | GL3          | eBioscience |
| IL-17A             | PE-Cy7           | TC11-18H10.1 | BioLegend   |
| IL-17A             | PE               | eBio17B7     | eBioscience |
| NK1.1              | AlexaFluor-488   | PK136        | BioLegend   |
| NK1.1              | PE-Cy7           | PK136        | BioLegend   |
| NKG2D              | PE/Dazzle594     | CX5          | BioLegend   |
| NKG2D              | APC              | CX5          | BioLegend   |
| NKG2D              | PE               | CX5          | eBioscience |
| NKp46              | BV421            | 29A1.4       | BioLegend   |
| PD-1               | BV650            | J43          | BD          |
| TCR Vg1            | PE               | 2.11         | BioLegend   |
| TCR Vg4            | APC              | UC3-10A6     | BioLegend   |
| TCR Vg4            | PeCy7            | UC3-10A6     | eBioscience |
| Zombie NIR         | N/A              | N/A          | BioLegend   |
| $\gamma\delta$ TCR | PerCp-eFluor 710 | GL3          | eBioscience |
| $\gamma\delta$ TCR | BV421            | GL3          | BD          |
| $\gamma\delta$ TCR | APC              | GL3          | eBioscience |
| $\gamma\delta$ TCR | PE-Cy5           | GL3          | eBioscience |
| $\gamma\delta$ TCR | FITC             | GL3          | eBioscience |



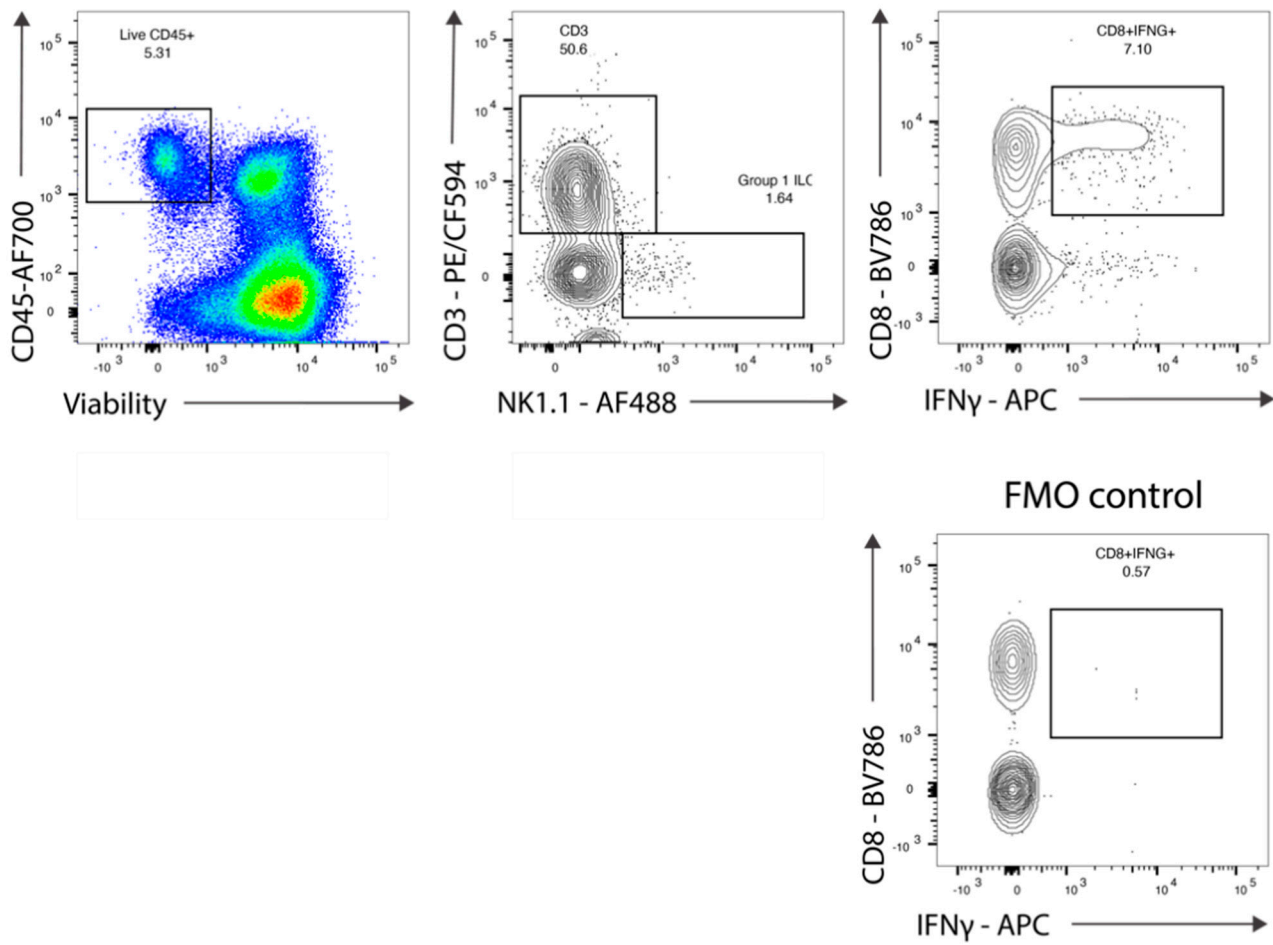

**Supplementary Figure S2.** Representative gating strategy to measure cytokine production by tumor-infiltrating CD8<sup>+</sup> T cells. FMO = fluorescent minus one.
